# Supplementary material for: Social, microbial, and immune factors linking bacterial vaginosis and infectious diseases
Source: JCI journal article supplement (doi:10.1172/jci184322), 2025-06-01
Supplement: sd1 [file 1]

## Supplemental Table 1: Single Nucleotide Polymorphisms Associated with BV and Inflammatory Phenotypes

Non-comprehensive list of studies that found associations or lack thereof between particular SNPs in Syndecans, Interleukins, Mannose Binding Lectins, or Toll-like Receptors and various types of observations such as increased or decreased risk of disease, presence of specific vaginal microbes, or other outcomes. For context, we note that most “Hispanic” and “Black” individuals share substantial European ancestry. Recent African ancestry contribution in self-identified African Americans ranges widely. (173,174) Considering the extremely rich genetic diversity in Africa, most genomic variants outside Africa represent but a fraction of those existing in Africa. Thus, people with more recent, even partial African ancestry, are found to carry SNP variants not found in people outside Africa.

| Gene | SNP         | Association       | Comparison Groups                                                                      | Source        | PMID     |
|------|-------------|-------------------|----------------------------------------------------------------------------------------|---------------|----------|
| SDC1 | rs4666298   | Increased BV risk | SNP carriers vs non-carriers of African Ancestry                                       | Murphy et al. | 38720636 |
|      | rs74346376  | Increased BV risk | SNP carriers vs non-carriers of African-Ancestry                                       |               |          |
| SDC2 | rs2439525   | Decreased BV risk | SNP carriers vs non-carriers of Hispanic-Ancestry (west & east coast participants)     |               |          |
|      | rs2582839   | Decreased BV risk | SNP carriers vs non-carriers of African & Hispanic-Ancestry (west coast participants)  |               |          |
|      | rs724235    | Decreased BV risk | SNP carriers vs non-carriers of African-Ancestry                                       |               |          |
|      | rs895034    | Decreased BV risk | SNP carriers vs non-carriers of African-Ancestry                                       |               |          |
| SDC3 | rs12085929  | Increased BV risk | SNP carriers vs non-carriers of European-Ancestry                                      |               |          |
|      | rs4949320   | Increased BV risk | SNP carriers vs non-carriers of European & Hispanic-Ancestry (west coast participants) |               |          |
|      | rs56090580  | Decreased BV risk | SNP carriers vs non-carriers of Hispanic-Ancestry (east coast participants)            |               |          |
| SDC4 | rs1008953   | Decreased BV risk | SNP carriers vs non-carriers of African-Ancestry                                       |               |          |
|      | rs2228384   | Increased BV risk | SNP carriers vs non-carriers of Hispanic-Ancestry (west coast participants)            |               |          |
|      | rs2267868   | Increased BV risk | SNP carriers vs non-carriers of African-Ancestry                                       |               |          |
|      | rs2284278   | Increased BV risk | SNP carriers vs non-carriers of African-Ancestry                                       |               |          |
| TLR1 | rs200232721 | Decreased BV risk | SNP carriers vs non-carriers of African-Ancestry                                       |               |          |
|      | rs200232721 | Increased BV risk | SNP carriers vs non-carriers of European-Ancestry                                      |               |          |
| TRL2 | rs1816702   | Increased BV risk | SNP carriers vs non-carriers of African-Ancestry                                       |               |          |
| TLR4 | rs10759930  | Increased BV risk | SNP carriers vs non-carriers of European-Ancestry                                      |               |          |
| TLR9 | rs187084    | Increased BV risk | SNP carriers vs non-carriers of Hispanic-Ancestry (west coast participants)            |               |          |

|        |                                             |                                                     |                                                                                        |              |          |
|--------|---------------------------------------------|-----------------------------------------------------|----------------------------------------------------------------------------------------|--------------|----------|
| IL1A   | rs2071376                                   | Increased BV risk                                   | SNP carriers vs non-carriers of European & Hispanic-Ancestry (east coast participants) |              |          |
| IL6    | rs1880243                                   | Increased BV risk                                   | SNP carriers vs non-carriers of African-Ancestry                                       |              |          |
|        | rs2069840                                   | Increased BV risk                                   | SNP carriers vs non-carriers of European-Ancestry                                      |              |          |
| IL1B   | rs3136558                                   | Decreased BV risk                                   | SNP carriers vs non-carriers of African-Ancestry                                       |              |          |
|        | rs10169916                                  | Decreased BV risk                                   | SNP carriers vs non-carriers of African-Ancestry                                       |              |          |
|        | rs12621220                                  | Decreased BV risk                                   | SNP carriers vs non-carriers of African-Ancestry                                       |              |          |
| IL2    | rs2069771                                   | Decreased BV risk                                   | SNP carriers vs non-carriers of African-Ancestry                                       |              |          |
| IL1RN  | rs62158853                                  | Decreased BV risk                                   | SNP carriers vs non-carriers of European-Ancestry                                      |              |          |
| MBL2   | rs7084554                                   | Carriage of C allele                                | Patients with recurrent vulvovaginal infection vs healthy control                      | Kenia et al. | 31080578 |
|        | rs36014597                                  | Carriage of G allele                                | Patients with recurrent vulvovaginal infection vs healthy control                      |              |          |
|        | rs7084554                                   | TC genotype                                         | Patients with vulvovaginal candidiasis vs healthy control                              |              |          |
|        |                                             |                                                     | Patients with mixed infections vs healthy control                                      |              |          |
|        |                                             | Carriage of C allele                                | Patients with BV vs healthy controls                                                   |              |          |
|        |                                             |                                                     | Patients with mixed infections vs healthy control                                      |              |          |
|        | rs36014597                                  | AG genotype                                         | Patients with BV vs healthy controls                                                   |              |          |
|        |                                             |                                                     | Patients with vulvovaginal candidiasis vs healthy control                              |              |          |
|        |                                             |                                                     | Patients with mixed infections vs healthy control                                      |              |          |
|        |                                             | Carriage of G allele                                | Patients with BV vs healthy controls                                                   |              |          |
|        |                                             | Carriage of G allele                                | Patients with vulvovaginal candidiasis vs healthy control                              |              |          |
|        |                                             | Carriage of G allele                                | Patients with mixed infections vs healthy control                                      |              |          |
| IL-1ra | IL1RN*2 (IL-1 receptor antagonist allele 2) | Lower prevalence of IL1RN*2 carriage in black women | All IL1RN*2 carriers vs All IL1RN*2 non-carriers                                       | Genc et al.  | 15507961 |
|        |                                             | Lower rate of spontaneous pre-term birth            |                                                                                        |              |          |
|        |                                             | Increased vaginal pH in IL1RN*2 carriers            |                                                                                        |              |          |
|        |                                             | Lower levels of Lactobacilli colonization           | Black women who are IL1RN*2 carriers vs non-carriers                                   |              |          |

|       |                   |                                                                  |                                                                                                    |                 |          |
|-------|-------------------|------------------------------------------------------------------|----------------------------------------------------------------------------------------------------|-----------------|----------|
|       |                   | Increased levels of gram negative rods                           |                                                                                                    |                 |          |
|       |                   | Increased rate of BV (Nugent score >7)                           |                                                                                                    |                 |          |
|       |                   | Reduced IL-1B response                                           | All IL1RN*2 carriers with abnormal microflora vs all IL1RN*2 non-carriers with abnormal microflora |                 |          |
| TLR4  | rs4986790         | Increased G. vaginalis abundance                                 |                                                                                                    | Genc et al.     | 15358455 |
|       |                   | Increased vaginal IL-1B                                          | TLR4 896G carriers with BV vs TLR4 896A homozygotes with BV                                        |                 |          |
|       |                   | Increased vaginal IL-1ra                                         |                                                                                                    |                 |          |
| MBL2  | Codon 54 allele B | Higher rate of allele B carriage                                 | Recurrent BV vs Acute BV                                                                           | Giraldo et al.  | 17470593 |
|       |                   | Higher rate of allele B carriage                                 | Individuals with recurrent Candidiasis vs healthy controls                                         |                 |          |
| MBL2  | rs11003099        | Decreased <i>L. iners</i> abundance                              | SNP carriers vs non-carriers                                                                       | Mehta et al.    | 32723796 |
|       | rs114589489       | Increased G. vaginalis abundance                                 | SNP carriers vs non-carriers                                                                       |                 |          |
|       | rs7077650         | Increased odds of CST-IV                                         | SNP carriers vs non-carriers                                                                       |                 |          |
| MBL2  | Codon 52          | No Association                                                   | Recurrent BV vs Healthy Controls                                                                   | Milanese et al. | 18211540 |
|       |                   |                                                                  | Recurrent vulvovaginal candidiasis vs Healthy Controls                                             |                 |          |
|       | Codon 54          | No Association                                                   | Recurrent BV vs Healthy Controls                                                                   |                 |          |
|       |                   |                                                                  | Recurrent vulvovaginal candidiasis vs Healthy Controls                                             |                 |          |
|       | Codon 55          | No Association                                                   | Recurrent BV vs Healthy Controls                                                                   |                 |          |
|       |                   |                                                                  | Recurrent vulvovaginal candidiasis vs Healthy Controls                                             |                 |          |
| TLR2  | rs11938228        | Increased likelihood of having cervical <i>Atopobium vaginae</i> | CC genotype vs AC genotype for TLR2 -1733 C>A                                                      | Taylor et al.   | 29286178 |
|       | rs1898830         |                                                                  | AA genotype vs AG genotype for TLR2 -616A>G                                                        |                 |          |
| IL-1B | rs1143634         | Lower risk of Preterm Birth                                      | IL-1B +3953C>T carriers vs IL-1B +3953C>T non-carriers                                             | Schmid et al.   | 22884587 |
